# Supplementary material for: Spray-coated barrier coating on copper based on exfoliated vermiculite sheets
Source: Royal Society of Chemistry journal article supplement (doi:10.1039/d1qm00340b), 2021-01-01
Supplement: d1qm00340b1.pdf [file d1qm00340b1.pdf]

## Support Information

### **Spray-coated Barrier Coating on Copper Based on Exfoliated Vermiculite Sheets**

*Limei Liu,<sup>\*,†,‡</sup> Zhi-Long Yu,<sup>†</sup> Junle Qu,<sup>‡</sup> and Jiaying Huang<sup>\*,†</sup>*

<sup>†</sup>Key Laboratory of Optoelectronic Devices and Systems of Ministry of Education and Guangdong Province, College of Physics and Optoelectronic Engineering, Shenzhen University, 3688 Nanhai Boulevard, Shenzhen, 518060, China

<sup>‡</sup>Department of Materials Science and Engineering, Northwestern University, Evanston, IL, 60208, USA

Email: limei.liu@szu.edu.cn (L. L.); jiaxing-huang@northwestern.edu (J. H.)

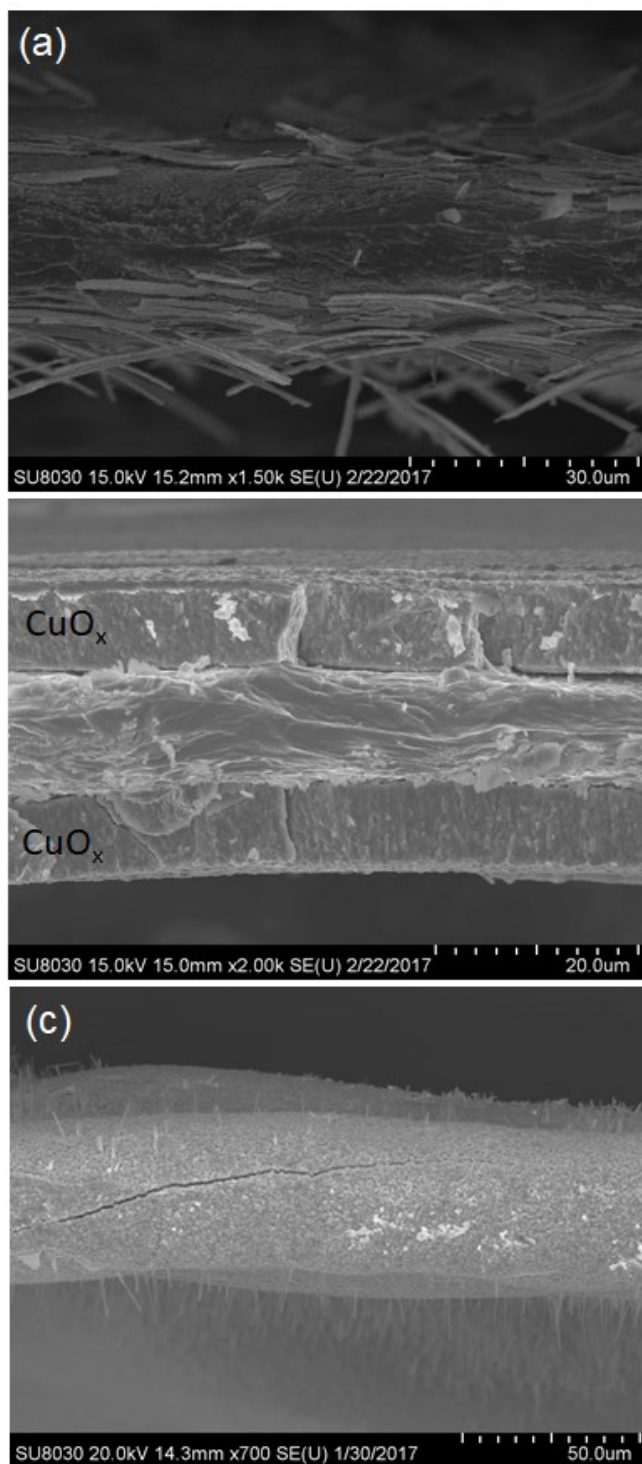

**Fig. S1** Cross-sectional SEM images of uncoated Cu foils after heating for 24 hours at (a) 200 °C (b) 300 °C and (c) 400 °C in air. In (a) large oxide flakes are observed on the top and bottom surfaces. In (b), such flakes were removed to observe the thick CuO<sub>x</sub> layer at the two sides. In (c), CuO<sub>x</sub> wires were grown on the two surfaces.

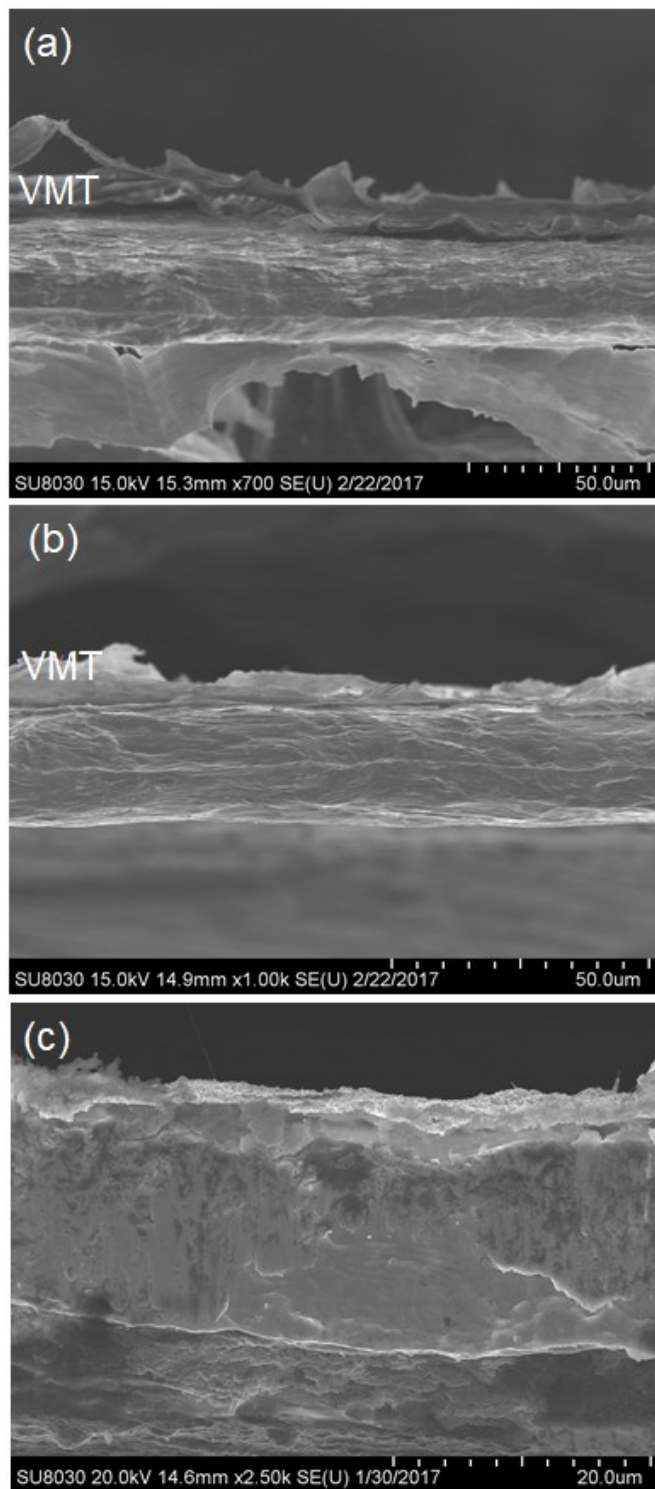

**Fig. S2** The cross-sectional SEM images of VMT-coated Cu after annealing for 24 hours in air at temperatures of (a) 200 °C (b) 300 °C and (c) 400 °C. The top and bottom surface (a and b) are covered with broken vermiculite coatings formed during sample preparation. In (c), no obvious oxide flakes or wires can be observed on the two surfaces.
